# Supplementary material for: Using solution- and solid-state S K-edge X-ray absorption spectroscopy with density functional theory to evaluate M–S bonding for MS42−(M = Cr, Mo, W) dianions
Source: Royal Society of Chemistry journal article supplement (doi:10.1039/c4dt02302a), 2014-10-14
Supplement: c4dt02302a1.pdf [file c4dt02302a1.pdf]

## ***Using Solution- and Solid-State S K-edge X-ray Absorption Spectroscopy with Density Functional Theory to Evaluate M–S Bonding for $MS_4^{2-}$ ( $M = Cr, Mo, W$ ) Dianions***

Angela C. Olson, Jason M. Keith, Enrique R. Batista,\* Kevin S. Boland, Scott R. Daly, Stosh A. Kozimor,\* Molly M. MacInnes, Richard L. Martin,\* and Brian L. Scott

### **Supporting Information**

|                                                                                                        |       |
|--------------------------------------------------------------------------------------------------------|-------|
| Complete Reference 71.....                                                                             | S2    |
| S K-edge XAS spectrum of $(PPh_4)_2MoS_4$ (Figure S1).....                                             | S2    |
| S K-edge XAS spectra and curve-fitting models for $MS_4^{2-}$ (Figures S2–S5).....                     | S3–S4 |
| Atomic coordinates obtained from gas-phase DFT calculations (Table S1).....                            | S5    |
| Atomic coordinates obtained from solution-phase DFT calculations (Table S2).....                       | S6    |
| Waves for background-subtracted and normalized $MoS_4^{2-}$ solution-phase XAS spectra (Table S3)..... | S6    |
| Waves for background-subtracted and normalized $WS_4^{2-}$ solution-phase XAS spectra (Table S4).....  | S18   |

Complete Reference 71: Frisch, M. J. T. G. W.; Schlegel, H. B.; Scuseria, G. E.; Robb, M. A.; Cheeseman, J. R.; Scalmani, G.; Barone, V.; Mennucci, B.; Petersson, G. A.; Nakatsuji, H.; Caricato, M.; Li, X.; Hratchian, H. P.; Izmaylov, A. F.; Bloino, J.; Zheng, G.; Sonnenberg, J. L.; Hada, M.; Ehara, M.; Toyota, K.; Fukuda, R.; Hasegawa, J.; Ishida, M.; Nakajima, T.; Honda, Y.; Kitao, O.; Nakai, H.; Vreven, T.; Montgomery, J. A., Jr; Peralta, J. E.; Ogliaro, F.; Bearpark, M.; Heyd, J. J.; Brothers, E.; Kudin, K. N.; Staroverov, V. N.; Kobayashi, R.; Normand, J.; Raghavachari, K.; Rendell, A.; Burant, J. C.; Iyengar, S. S.; Tomasi, J.; Cossi, M.; Rega, N.; Millam, N. J.; Klene, M.; Knox, J. E.; Cross, J. B.; Bakken, V.; Adamo, C.; Jaramillo, J.; Gomperts, R.; Stratmann, R. E.; Yazyev, O.; Austin, A. J.; Cammi, R.; Pomelli, C.; Ochterski, J. W.; Martin, R. L.; Morokuma, K.; Zakrzewski, V. G.; Voth, G. A.; Salvador, P.; Dannenberg, J. J.; Dapprich, S.; Daniels, A. D.; Farkas, Ö.; Foresman, J. B.; Ortiz, J. V.; Cioslowski, J.; Fox, D. J. Gaussian 09, Revision B.01, Wallingford, CT; 2009.

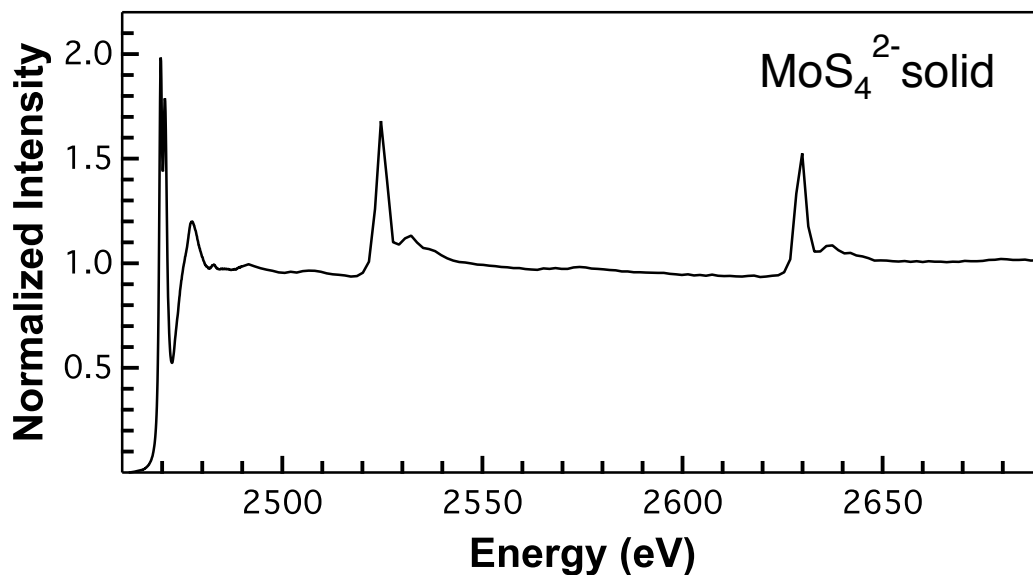

**Figure S1.** S K-edge X-ray absorption spectrum for (PPh<sub>4</sub>)<sub>2</sub>MoS<sub>4</sub> solid with Mo L<sub>3/2</sub>-edge absorptions at 2525 and 2630 eV.

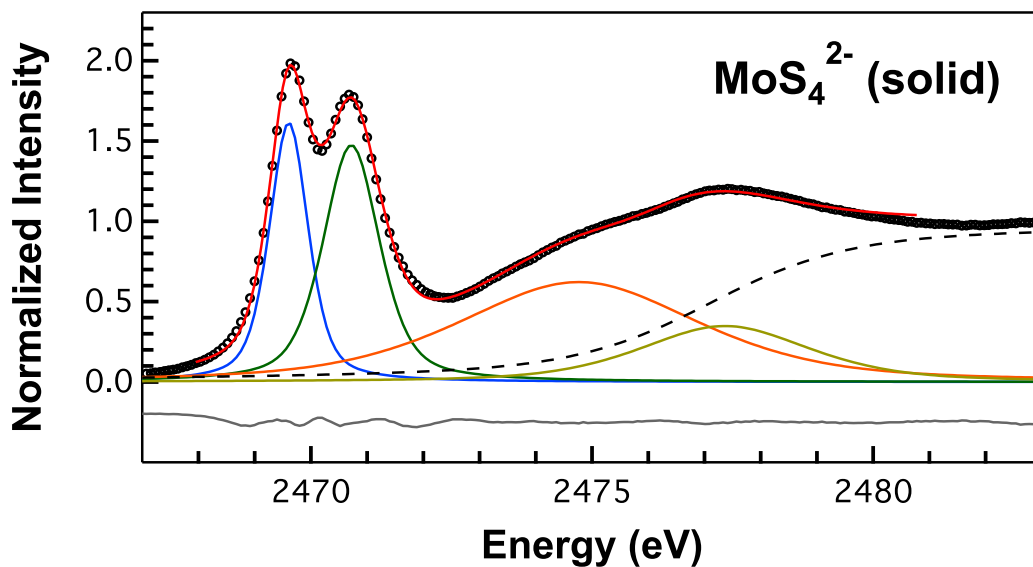

**Figure S2.** S K-edge X-ray absorption data (●) for (PPh<sub>4</sub>)<sub>2</sub>MoS<sub>4</sub> solid. Models for the data (red trace), pre-edge functions (blue and green traces), post-edge functions (orange and brown traces), as well as the step function (dashed line) are provided. Residual data (gray, offset) was determined by subtracting the curve fit from the experimental data.

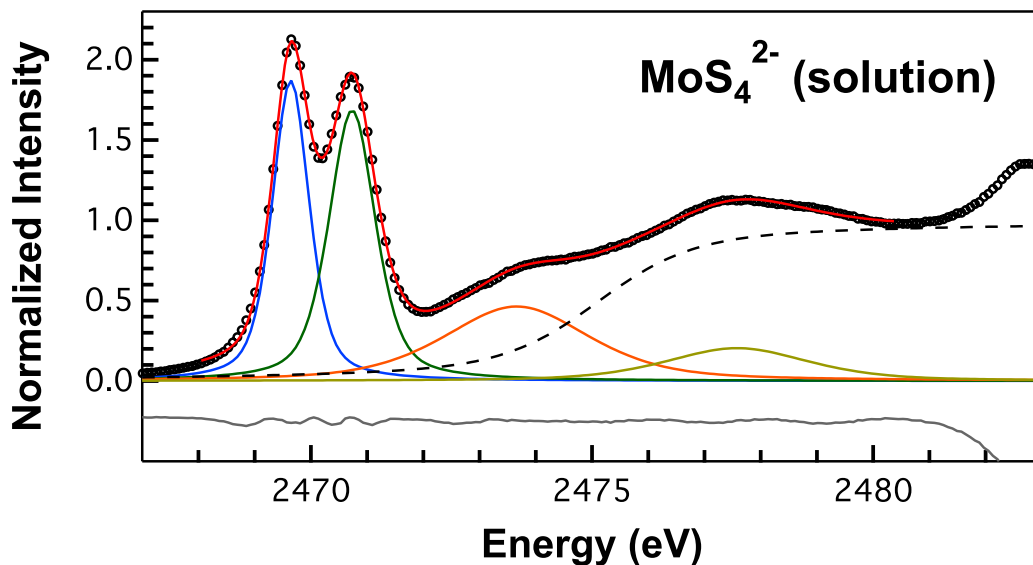

**Figure S3.** S K-edge X-ray absorption data (●) for (PPh<sub>4</sub>)<sub>2</sub>MoS<sub>4</sub> in acetonitrile (0.06 M). Models for the data (red trace), pre-edge functions (blue and green traces), post-edge functions (orange and brown traces), as well as the step function (dashed line) are provided. Residual data (gray, offset) was determined by subtracting the curve fit from the experimental data.

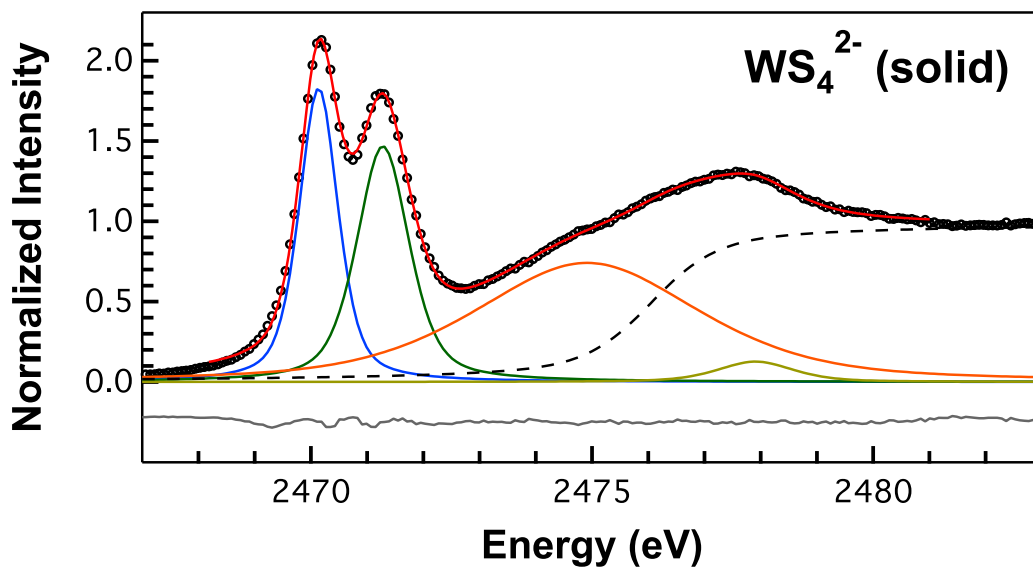

**Figure S4.** S K-edge X-ray absorption data (●) for (PPh<sub>4</sub>)<sub>2</sub>WS<sub>4</sub> solid. Models for the data (red trace), pre-edge functions (blue and green traces), post-edge functions (orange and brown traces), as well as the step function (dashed line) are provided. Residual data (gray, offset) was determined by subtracting the curve fit from the experimental data.

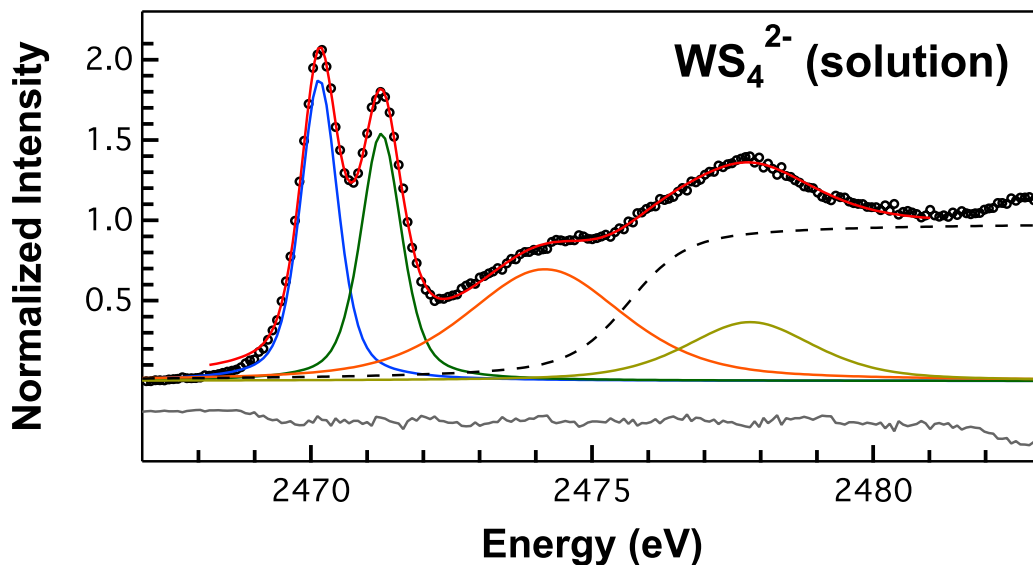

**Figure S5.** S K-edge X-ray absorption data (●) for (PPh<sub>4</sub>)<sub>2</sub>WS<sub>4</sub> in acetonitrile (0.06 M). Models for the data (red trace), pre-edge functions (blue and green traces), post-edge functions (orange and brown traces), as well as the step function (dashed line) are provided. Residual data (gray, offset) was determined by subtracting the curve fit from the experimental data.

**Table S1.** Atomic coordinates and Mulliken charges for the gas-phase DFT  $MS_4^{2-}$  structures.

| <b>CrS<sub>4</sub><sup>2-</sup></b> |        | Coordinates (Angstroms) |           |           | Mulliken Charges |
|-------------------------------------|--------|-------------------------|-----------|-----------|------------------|
| Atom Type                           | Atom # | x                       | y         | z         |                  |
| Cr                                  | 1      | 0.000000                | 0.000000  | 0.000000  | 0.244403         |
| S                                   | 2      | 1.205456                | 1.205456  | 1.205456  | -0.561101        |
| S                                   | 3      | -1.205456               | -1.205456 | 1.205456  | -0.561101        |
| S                                   | 4      | -1.205456               | 1.205456  | -1.205456 | -0.561101        |
| S                                   | 5      | 1.205456                | -1.205456 | -1.205456 | -0.561101        |
|                                     |        |                         |           |           |                  |
| <b>MoS<sub>4</sub><sup>2-</sup></b> |        | Coordinates (Angstroms) |           |           | Mulliken Charges |
| Atom Type                           | Atom # | x                       | y         | z         |                  |
| Mo                                  | 1      | 0.000000                | 0.000000  | 0.000000  | 0.549911         |
| S                                   | 2      | 1.278254                | 1.278254  | 1.278254  | -0.637478        |
| S                                   | 3      | -1.278254               | -1.278254 | 1.278254  | -0.637478        |
| S                                   | 4      | -1.278254               | 1.278254  | -1.278254 | -0.637478        |
| S                                   | 5      | 1.278254                | -1.278254 | -1.278254 | -0.637478        |
|                                     |        |                         |           |           |                  |
| <b>WS<sub>4</sub><sup>2-</sup></b>  |        | Coordinates (Angstroms) |           |           | Mulliken Charges |
| Atom Type                           | Atom # | x                       | y         | z         |                  |
| W                                   | 1      | 0.000000                | 0.000000  | 0.000000  | 0.409095         |
| S                                   | 2      | 1.279307                | 1.279307  | 1.279307  | -0.602274        |
| S                                   | 3      | -1.279307               | -1.279307 | 1.279307  | -0.602274        |
| S                                   | 4      | -1.279307               | -1.279307 | -1.279307 | -0.602274        |
| S                                   | 5      | 1.279307                | -1.279307 | -1.279307 | -0.602274        |

**Table S2.** Atomic coordinates and Mulliken charges for the solution-phase DFT  $MS_4^{2-}$  structures.

| <b>CrS<sub>4</sub><sup>2-</sup></b> |        | Coordinates (Angstroms) |           |           | Mulliken Charges |
|-------------------------------------|--------|-------------------------|-----------|-----------|------------------|
| Atom Type                           | Atom # | x                       | y         | z         |                  |
| Cr                                  | 1      | 0.000000                | 0.000000  | 0.000000  | 0.065773         |
| S                                   | 2      | 1.201911                | 1.201911  | 1.201911  | -0.516443        |
| S                                   | 3      | -1.201911               | -1.201911 | 1.201911  | -0.516443        |
| S                                   | 4      | -1.201911               | 1.201911  | -1.201911 | -0.516443        |
| S                                   | 5      | 1.201911                | -1.201911 | -1.201911 | -0.516443        |
|                                     |        |                         |           |           |                  |
| <b>MoS<sub>4</sub><sup>2-</sup></b> |        | Coordinates (Angstroms) |           |           | Mulliken Charges |
| Atom Type                           | Atom # | x                       | y         | z         |                  |
| Mo                                  | 1      | 0.000000                | 0.000000  | 0.000000  | 0.378618         |
| S                                   | 2      | 1.273743                | 1.273743  | 1.273743  | -0.594655        |
| S                                   | 3      | -1.273743               | -1.273743 | 1.273743  | -0.594655        |
| S                                   | 4      | -1.273743               | 1.273743  | -1.273743 | -0.594655        |
| S                                   | 5      | 1.273743                | -1.273743 | -1.273743 | -0.594655        |
|                                     |        |                         |           |           |                  |
| <b>WS<sub>4</sub><sup>2-</sup></b>  |        | Coordinates (Angstroms) |           |           | Mulliken Charges |
| Atom Type                           | Atom # | x                       | y         | z         |                  |
| W                                   | 1      | 0.000000                | 0.000000  | 0.000000  | 0.259149         |
| S                                   | 2      | 1.276250                | 1.276250  | 1.276250  | -0.564787        |
| S                                   | 3      | -1.276250               | -1.276250 | 1.276250  | -0.564787        |
| S                                   | 4      | -1.276250               | 1.276250  | -1.276250 | -0.564787        |
| S                                   | 5      | 1.276250                | -1.276250 | -1.276250 | -0.564787        |

**Table S3.** Waves for background-subtracted and normalized  $MoS_4^{2-}$  solution-phase XAS spectra.

| MoS4_soln_Int         | MoS4_soln_eV |
|-----------------------|--------------|
| 0.0004939578099999999 | 2400.0095    |
| 0.0005932031491666669 | 2401.0105    |
| 0.001660703849166667  | 2402.0105    |
| 0.0002330755425       | 2403.0105    |
| 0.0017607427          | 2404.0095    |
| 0.000744332625        | 2405.0102    |
| 1.803931916666691e-05 | 2406.0098    |
| 0.001311184125        | 2407.0093    |
| 0.001302242669166666  | 2408.0093    |
| 0.001362301215        | 2409.0095    |

|                        |           |
|------------------------|-----------|
| 0.0009610863683333333  | 2410.0098 |
| -0.0004398598508333334 | 2411.0105 |
| -0.0012957847583333333 | 2412.0098 |
| 0.001463105798416666   | 2413.0093 |
| 0.0020641273625        | 2414.0107 |
| -0.0008885830200000003 | 2415.0105 |
| 0.0014168834358333333  | 2416.0107 |
| 2.936022999999992e-05  | 2417.0095 |
| -0.0024299847325       | 2418.01   |
| -0.002646195083        | 2419.0093 |
| -0.00121776591         | 2420.0102 |
| -0.0024758172633333333 | 2421.0098 |
| -0.0035005770866666666 | 2422.0095 |
| 0.0211458099833333333  | 2423.0093 |
| -0.0010097769111666667 | 2424.0093 |
| -0.0010653791108333333 | 2425.0095 |
| -0.0013965813733333333 | 2426.0098 |
| -0.0008051218583333331 | 2427.0102 |
| 9.542385833333331e-05  | 2428.0107 |
| -0.0004386797049999998 | 2429.0098 |
| -0.00199728358975      | 2430.0107 |
| -0.0006631995516666665 | 2431.01   |
| -0.001660411447413333  | 2432.0095 |
| -0.0013416370416666667 | 2433.0107 |
| -0.0017293413833333333 | 2434.0105 |
| -0.0018559455041666666 | 2435.0102 |
| -0.0003611638609999999 | 2436.01   |
| -0.001522816860083334  | 2437.01   |
| -0.0013583317383333334 | 2438.01   |
| -0.0022633136133333333 | 2439.0102 |
| -0.0013387604941666667 | 2440.0105 |
| -0.0009620183883333333 | 2441.0107 |
| -0.0042647835633333333 | 2442.0095 |
| -0.0029785271716666666 | 2443.0098 |
| -0.0005955246308333332 | 2444.0102 |
| -0.004401809975        | 2445.0107 |
| -0.0012351057266666667 | 2446.0098 |
| -0.0010062207883333333 | 2447.0102 |
| -0.0021156141416666666 | 2448.0107 |
| -0.0038273691333333333 | 2449.0098 |
| -0.0007571211916666668 | 2450.0105 |
| -0.0008284691650000002 | 2451.0095 |
| -0.001395977395        | 2452.01   |
| -0.001215291825        | 2453.0107 |
| -0.0018106459141666667 | 2454.0098 |
| -0.001133088235        | 2455.0105 |

|                      |           |
|----------------------|-----------|
| -0.001184181925      | 2456.0095 |
| 0.002875839459166667 | 2457.01   |
| 0.001536834410916667 | 2458.0107 |
| 0.0012208717925      | 2459.0095 |
| 0.00237144836        | 2460.0102 |
| 0.005964471341666667 | 2461.0107 |
| 0.005172977133333334 | 2462.0095 |
| 0.009616038333333332 | 2463.01   |
| 0.012004696383333333 | 2464.0102 |
| 0.017500131083333333 | 2465.0105 |
| 0.018053677          | 2465.0908 |
| 0.020249236          | 2465.1709 |
| 0.02015237691666667  | 2465.2493 |
| 0.02100109441666667  | 2465.3293 |
| 0.02230749716666667  | 2465.4097 |
| 0.022203099833333333 | 2465.4897 |
| 0.023491631333333333 | 2465.5698 |
| 0.025556629083333333 | 2465.6499 |
| 0.024364714583333334 | 2465.7302 |
| 0.026640161083333334 | 2465.8103 |
| 0.02640792075        | 2465.8906 |
| 0.029226399583333333 | 2465.9707 |
| 0.027702648          | 2466.0493 |
| 0.02851526891666667  | 2466.1296 |
| 0.03196899475        | 2466.2097 |
| 0.03264402466666667  | 2466.29   |
| 0.035208877          | 2466.3704 |
| 0.034593127083333333 | 2466.4507 |
| 0.03624642491666666  | 2466.5293 |
| 0.03957466866666667  | 2466.6096 |
| 0.04036932525        | 2466.6897 |
| 0.04164631150000001  | 2466.77   |
| 0.04242632925        | 2466.8503 |
| 0.044216587583333333 | 2466.9307 |
| 0.04692416625        | 2467.0095 |
| 0.050823326333333333 | 2467.0898 |
| 0.053548603083333332 | 2467.1702 |
| 0.054167907833333334 | 2467.2505 |
| 0.059065179833333332 | 2467.3293 |
| 0.06117183991666666  | 2467.4097 |
| 0.06820325200000001  | 2467.49   |
| 0.071806329          | 2467.5703 |
| 0.07609262641666667  | 2467.6492 |
| 0.08196357191666666  | 2467.7297 |
| 0.08787260891666666  | 2467.81   |
| 0.09324404966666666  | 2467.8906 |



|                    |           |
|--------------------|-----------|
| 0.1022024348333333 | 2467.9692 |
| 0.1095473825       | 2468.0498 |
| 0.1216024333333334 | 2468.1304 |
| 0.1331005283333333 | 2468.2107 |
| 0.1465799683333333 | 2468.2895 |
| 0.1658224575       | 2468.3701 |
| 0.1814372566666666 | 2468.4507 |
| 0.2074953708333334 | 2468.5295 |
| 0.2394111183333333 | 2468.6101 |
| 0.2733375991666666 | 2468.6907 |
| 0.3170409725       | 2468.7695 |
| 0.3783565466666667 | 2468.8501 |
| 0.4503606533333334 | 2468.9307 |
| 0.5512195375       | 2469.0095 |
| 0.6826899850000001 | 2469.0903 |
| 0.8465295725       | 2469.1692 |
| 1.0658176583333333 | 2469.2497 |
| 1.3191267833333333 | 2469.3303 |
| 1.588647           | 2469.4094 |
| 1.8412155833333334 | 2469.49   |
| 2.0442128          | 2469.5708 |
| 2.12692835         | 2469.6496 |
| 2.0864523416666666 | 2469.7305 |
| 1.96373355         | 2469.8096 |
| 1.778088875        | 2469.8901 |
| 1.5976582916666667 | 2469.9692 |
| 1.4576270666666667 | 2470.05   |
| 1.3886107583333333 | 2470.1306 |
| 1.3860778166666667 | 2470.2097 |
| 1.441816125        | 2470.2905 |
| 1.5381982416666667 | 2470.3696 |
| 1.6522219083333333 | 2470.4504 |
| 1.7684822916666666 | 2470.5295 |
| 1.8437418916666667 | 2470.6103 |
| 1.893579425        | 2470.6894 |
| 1.8877161666666666 | 2470.7703 |
| 1.8233266916666667 | 2470.8494 |
| 1.7088376833333333 | 2470.9302 |
| 1.5509971916666667 | 2471.0095 |
| 1.377381975        | 2471.0903 |
| 1.1904426666666667 | 2471.1697 |
| 1.01649376         | 2471.2505 |
| 0.870264975        | 2471.3296 |
| 0.7368695499999999 | 2471.4106 |
| 0.6410806475       | 2471.4897 |
| 0.566853455        | 2471.5708 |

|                    |           |
|--------------------|-----------|
| 0.5146624408333333 | 2471.6499 |
| 0.4748613999999999 | 2471.7292 |
| 0.4510946641666667 | 2471.8103 |
| 0.43501735         | 2471.8894 |
| 0.4294811566666667 | 2471.9704 |
| 0.4301107875000001 | 2472.0498 |
| 0.4320538899999999 | 2472.1308 |
| 0.4465048216666666 | 2472.2102 |
| 0.4592194458333334 | 2472.2895 |
| 0.4743921083333333 | 2472.3704 |
| 0.4875453058333334 | 2472.4499 |
| 0.5082238766666666 | 2472.5293 |
| 0.5213239175000001 | 2472.6103 |
| 0.5356155375       | 2472.6897 |
| 0.5484019425       | 2472.7707 |
| 0.5646260408333332 | 2472.8501 |
| 0.578081555        | 2472.9297 |
| 0.59603569         | 2473.0107 |
| 0.6021823175       | 2473.0901 |
| 0.6102384366666668 | 2473.1697 |
| 0.628362305        | 2473.2507 |
| 0.6436455208333333 | 2473.3301 |
| 0.6617515300000001 | 2473.4097 |
| 0.6808168458333332 | 2473.4907 |
| 0.6855197733333332 | 2473.5703 |
| 0.6991889341666667 | 2473.6499 |
| 0.7116065441666667 | 2473.7295 |
| 0.7211174558333333 | 2473.8105 |
| 0.7257160433333333 | 2473.8901 |
| 0.7333912408333333 | 2473.9697 |
| 0.7383018425       | 2474.0493 |
| 0.7433331299999999 | 2474.1304 |
| 0.7496320958333333 | 2474.21   |
| 0.7491566141666666 | 2474.2895 |
| 0.751447275        | 2474.3691 |
| 0.7563771983333334 | 2474.4504 |
| 0.7550349116666667 | 2474.53   |
| 0.7663830633333334 | 2474.6099 |
| 0.7731730350000001 | 2474.6894 |
| 0.7748966841666668 | 2474.7707 |
| 0.7814053991666667 | 2474.8503 |
| 0.7881634841666667 | 2474.9302 |
| 0.7917785400000001 | 2475.0098 |
| 0.8004676233333333 | 2475.0896 |
| 0.8124641991666666 | 2475.1709 |
| 0.8170086825       | 2475.2505 |

|                    |           |
|--------------------|-----------|
| 0.8342167666666667 | 2475.3303 |
| 0.8343756466666666 | 2475.4099 |
| 0.8455670624999999 | 2475.4897 |
| 0.8575056075000002 | 2475.5696 |
| 0.8609495925       | 2475.6492 |
| 0.8753511166666667 | 2475.7307 |
| 0.8901979191666665 | 2475.8105 |
| 0.9021656199999999 | 2475.8904 |
| 0.9079509583333333 | 2475.97   |
| 0.9224188400000001 | 2476.0498 |
| 0.93582024         | 2476.1296 |
| 0.9484717075000001 | 2476.2095 |
| 0.9673564850000002 | 2476.2893 |
| 0.9750150275       | 2476.3694 |
| 0.9919180049999999 | 2476.4507 |
| 1.007708344166667  | 2476.5308 |
| 1.024232633333333  | 2476.6106 |
| 1.0420573          | 2476.6904 |
| 1.05246305         | 2476.7703 |
| 1.065969425        | 2476.8503 |
| 1.074067183333333  | 2476.9302 |
| 1.088682925        | 2477.01   |
| 1.1008045          | 2477.0901 |
| 1.110094408333333  | 2477.1699 |
| 1.115945541666667  | 2477.25   |
| 1.124632025        | 2477.3298 |
| 1.1233578          | 2477.4099 |
| 1.127889533333333  | 2477.49   |
| 1.122293516666667  | 2477.5698 |
| 1.12300175         | 2477.6499 |
| 1.128132358333333  | 2477.73   |
| 1.127284608333333  | 2477.81   |
| 1.118502516666667  | 2477.8901 |
| 1.118723033333333  | 2477.97   |
| 1.115170783333333  | 2478.05   |
| 1.108491083333333  | 2478.1301 |
| 1.1067358          | 2478.2102 |
| 1.099920633333333  | 2478.2903 |
| 1.102278983333333  | 2478.3704 |
| 1.096546491666666  | 2478.4507 |
| 1.097015441666667  | 2478.5308 |
| 1.088947983333333  | 2478.6091 |
| 1.088330508333333  | 2478.6894 |
| 1.083675675        | 2478.7695 |
| 1.0836255          | 2478.8496 |
| 1.081089516666667  | 2478.9297 |

|                    |           |
|--------------------|-----------|
| 1.072000016666667  | 2479.01   |
| 1.067036316666667  | 2479.0901 |
| 1.064379933333333  | 2479.1704 |
| 1.056691           | 2479.2505 |
| 1.046703425        | 2479.3308 |
| 1.043113141666667  | 2479.4094 |
| 1.036415033333333  | 2479.4895 |
| 1.027030941666667  | 2479.5698 |
| 1.025604258333333  | 2479.6501 |
| 1.009467756666667  | 2479.7305 |
| 1.009070809166667  | 2479.8105 |
| 1.000097186666667  | 2479.8894 |
| 0.9936257891666666 | 2479.9695 |
| 0.9918252558333335 | 2480.0498 |
| 0.9889498258333335 | 2480.1301 |
| 0.9806361300000001 | 2480.2104 |
| 0.9797851766666668 | 2480.2893 |
| 0.9796722491666666 | 2480.3696 |
| 0.9802159441666668 | 2480.4499 |
| 0.9776642283333334 | 2480.5303 |
| 0.9780302758333331 | 2480.6106 |
| 0.98383867         | 2480.6894 |
| 0.9832188024999998 | 2480.7698 |
| 0.9823219974999998 | 2480.8501 |
| 0.9921074416666666 | 2480.9307 |
| 0.9931716216666667 | 2481.0093 |
| 0.9948268075000001 | 2481.0898 |
| 0.9989469891666666 | 2481.1702 |
| 1.0073610275       | 2481.2507 |
| 1.019823058333333  | 2481.3296 |
| 1.027907325        | 2481.4099 |
| 1.043407816666667  | 2481.4905 |
| 1.046554433333333  | 2481.5693 |
| 1.064218266666667  | 2481.6496 |
| 1.080866325        | 2481.7302 |
| 1.101114208333333  | 2481.8108 |
| 1.113576108333333  | 2481.8896 |
| 1.145902925        | 2481.9702 |
| 1.165250441666666  | 2482.0508 |
| 1.195810008333333  | 2482.1296 |
| 1.218062075        | 2482.2102 |
| 1.2555631          | 2482.2908 |
| 1.283510308333333  | 2482.3696 |
| 1.311077116666667  | 2482.4504 |
| 1.334184875        | 2482.5293 |
| 1.350622208333333  | 2482.6099 |

|                   |           |
|-------------------|-----------|
| 1.3506392         | 2482.6904 |
| 1.351617341666667 | 2482.7695 |
| 1.349202291666667 | 2482.8501 |
| 1.327332741666667 | 2482.9309 |
| 1.314198666666667 | 2483.0098 |
| 1.287593683333333 | 2483.0906 |
| 1.260023216666667 | 2483.1694 |
| 1.226380258333333 | 2483.2502 |
| 1.2021027         | 2483.3293 |
| 1.16658695        | 2483.4099 |
| 1.132393208333333 | 2483.4907 |
| 1.100366925       | 2483.5698 |
| 1.074995633333333 | 2483.6506 |
| 1.056888216666666 | 2483.7297 |
| 1.0335184525      | 2483.8103 |
| 1.02693775        | 2483.8894 |
| 1.017041326666666 | 2483.9702 |
| 0.990861728333333 | 2484.0493 |
| 0.980420441666666 | 2484.1301 |
| 0.974408694166666 | 2484.2095 |
| 0.965457091666666 | 2484.2903 |
| 0.961689335       | 2484.3694 |
| 0.960020237499999 | 2484.4502 |
| 0.955637090000001 | 2484.5293 |
| 0.949317924166666 | 2484.6103 |
| 0.948953531666666 | 2484.6894 |
| 0.952685774166667 | 2484.7703 |
| 0.943486342500001 | 2484.8496 |
| 0.949866401666666 | 2484.9304 |
| 0.941389985000002 | 2485.0098 |
| 0.943021935833333 | 2485.0906 |
| 0.948169581666666 | 2485.1699 |
| 0.944927513333333 | 2485.2493 |
| 0.946003560833333 | 2485.3301 |
| 0.946367131666667 | 2485.4094 |
| 0.94473861        | 2485.4905 |
| 0.950566299999999 | 2485.5698 |
| 0.952487836666666 | 2485.6506 |
| 0.955332069166665 | 2485.73   |
| 0.953730724166667 | 2485.8093 |
| 0.954922702499999 | 2485.8904 |
| 0.953281179166665 | 2485.9697 |
| 0.956049625       | 2486.0508 |
| 0.9615359         | 2486.1301 |
| 0.956642794166665 | 2486.2095 |
| 0.960076294999999 | 2486.2908 |

|                    |           |
|--------------------|-----------|
| 0.9598739391666666 | 2486.3701 |
| 0.9616697533333332 | 2486.4495 |
| 0.9619307499999999 | 2486.5305 |
| 0.9658217358333334 | 2486.6101 |
| 0.9578056483333336 | 2486.6894 |
| 0.9606564799999999 | 2486.7705 |
| 0.9658821841666668 | 2486.8501 |
| 0.9622691199999998 | 2486.9294 |
| 0.9612220674999999 | 2487.0107 |
| 0.9618397          | 2487.0901 |
| 0.9645029908333335 | 2487.1697 |
| 0.9671317091666668 | 2487.2493 |
| 0.9606907399999999 | 2487.3303 |
| 0.9679686508333334 | 2487.4099 |
| 0.9702352200000001 | 2487.4895 |
| 0.9712415600000001 | 2487.5708 |
| 0.9744763116666668 | 2487.6504 |
| 0.9744591324999999 | 2487.7297 |
| 0.9763070716666667 | 2487.8093 |
| 0.9778144958333335 | 2487.8906 |
| 0.9722754408333335 | 2487.9702 |
| 0.9755079416666667 | 2488.0498 |
| 0.9845850799999999 | 2488.1296 |
| 0.9792202500000001 | 2488.2109 |
| 0.9843079600000001 | 2488.2905 |
| 0.9923023125       | 2488.3701 |
| 0.9876567508333333 | 2488.4497 |
| 0.9907245750000001 | 2488.5295 |
| 0.9949683783333333 | 2488.6108 |
| 0.9931727608333333 | 2488.6904 |
| 0.9948428674999999 | 2488.7703 |
| 0.9964734999999999 | 2488.8498 |
| 0.9946271666666665 | 2488.9297 |
| 1.0001970208333333 | 2489.0093 |
| 0.9943884299999999 | 2489.0908 |
| 1.00024203         | 2489.1704 |
| 1.0007145041666667 | 2489.2502 |
| 0.9967397666666667 | 2489.3301 |
| 0.9997623008333333 | 2489.4097 |
| 0.9926178641666666 | 2489.4895 |
| 1.0018613266666667 | 2489.5693 |
| 0.9988333524999998 | 2489.6509 |
| 0.9990538058333334 | 2489.7307 |
| 1.0035865591666666 | 2489.8105 |
| 1.0040313208333333 | 2489.8904 |
| 1.0014459333333333 | 2489.9702 |

|                    |           |
|--------------------|-----------|
| 1.002360979166667  | 2490.01   |
| 0.9981545650000001 | 2491.0107 |
| 0.9990237591666665 | 2492.51   |
| 1.002417401666667  | 2494.0095 |
| 1.0036269          | 2495.5107 |
| 1.010911948333333  | 2497.01   |
| 1.013286770833333  | 2498.5095 |
| 1.010850919166667  | 2500.0105 |
| 1.01015766         | 2501.5095 |
| 1.005933053333333  | 2503.0105 |
| 1.0052777175       | 2504.5095 |
| 1.010212174166667  | 2506.01   |
| 1.014141915        | 2507.5105 |
| 1.009687848333333  | 2509.0093 |
| 1.009628440833333  | 2510.5093 |
| 1.000423176666667  | 2512.0093 |
| 0.9858534916666669 | 2513.509  |
| 0.9969300358333334 | 2515.0105 |
| 0.9978102674999999 | 2516.51   |
| 1.0042109375       | 2518.0107 |
| 1.022214041666667  | 2519.5098 |
| 1.07090755         | 2521.01   |
| 1.237868358333333  | 2522.5102 |
| 1.892901816666667  | 2524.01   |
| 2.253322491666666  | 2525.5098 |
| 1.361612641666667  | 2527.0107 |
| 1.239245133333333  | 2528.5095 |
| 1.264348266666667  | 2530.01   |
| 1.321422           | 2531.51   |
| 1.329525366666667  | 2533.0095 |
| 1.283568991666667  | 2534.5105 |
| 1.259829591666667  | 2536.0093 |
| 1.245391275        | 2537.5095 |
| 1.237769041666667  | 2539.0093 |
| 1.220099958333333  | 2540.5105 |
| 1.211531516666666  | 2542.0095 |
| 1.20674125         | 2543.5098 |
| 1.200392           | 2545.0095 |
| 1.195675316666667  | 2546.5105 |
| 1.194023608333333  | 2548.0093 |
| 1.195242208333333  | 2549.5093 |
| 1.189951483333333  | 2551.0107 |
| 1.198311566666667  | 2552.5098 |
| 1.192225908333333  | 2554.01   |
| 1.1976655          | 2555.5098 |
| 1.191988358333333  | 2557.0107 |

|                   |           |
|-------------------|-----------|
| 1.197991016666667 | 2558.5093 |
| 1.199324216666667 | 2560.0107 |
| 1.197730741666667 | 2561.51   |
| 1.200077508333333 | 2563.0102 |
| 1.2095918         | 2564.51   |
| 1.207887958333333 | 2566.011  |
| 1.218857166666667 | 2567.5093 |
| 1.220218083333333 | 2569.0107 |
| 1.231108641666667 | 2570.5095 |
| 1.242912941666667 | 2572.0095 |
| 1.239120516666667 | 2573.5107 |
| 1.248603741666667 | 2575.0093 |
| 1.248911925       | 2576.5107 |
| 1.256190233333333 | 2578.0098 |
| 1.247780491666666 | 2579.5098 |
| 1.254245683333333 | 2581.0107 |
| 1.253460858333333 | 2582.5093 |
| 1.258762566666667 | 2584.0105 |
| 1.25780515        | 2585.5093 |
| 1.255181275       | 2587.011  |
| 1.259495991666667 | 2588.5098 |
| 1.255017358333333 | 2590.0098 |
| 1.261562925       | 2591.5107 |
| 1.26219895        | 2593.0107 |
| 1.263505333333333 | 2594.51   |
| 1.262611466666667 | 2596.0102 |
| 1.268386566666667 | 2597.5095 |
| 1.264538475       | 2599.0098 |
| 1.272788183333333 | 2600.509  |
| 1.269869625       | 2602.0093 |
| 1.274192275       | 2603.5107 |
| 1.274425208333333 | 2605.011  |
| 1.2803941         | 2606.5102 |
| 1.2792612         | 2608.0105 |
| 1.283735825       | 2609.5095 |
| 1.283511441666667 | 2611.0098 |
| 1.288947983333333 | 2612.5107 |
| 1.288876583333333 | 2614.0107 |
| 1.28861045        | 2615.5098 |
| 1.2921796         | 2617.0095 |
| 1.293273416666667 | 2618.51   |
| 1.300126266666667 | 2620.0098 |
| 1.307779116666667 | 2621.51   |
| 1.311123566666667 | 2623.0095 |
| 1.324579016666666 | 2624.5095 |
| 1.364136366666667 | 2626.0105 |



|                   |           |
|-------------------|-----------|
| 1.509610591666666 | 2627.5102 |
| 2.052726358333333 | 2629.011  |
| 2.00496685        | 2630.5105 |
| 1.549569583333333 | 2632.0107 |
| 1.499590141666667 | 2633.5098 |
| 1.5165837         | 2635.0095 |
| 1.561107208333333 | 2636.51   |
| 1.566370666666667 | 2638.0095 |
| 1.544956433333333 | 2639.5095 |
| 1.529392958333333 | 2641.0105 |
| 1.52802325        | 2642.51   |
| 1.528993916666667 | 2644.0102 |
| 1.523559108333333 | 2645.5093 |
| 1.520423091666667 | 2647.009  |
| 1.516656916666666 | 2648.5095 |
| 1.519380216666667 | 2650.0105 |
| 1.52188075        | 2651.5102 |
| 1.517056816666667 | 2653.0107 |
| 1.523801675       | 2654.51   |
| 1.524181191666667 | 2656.0098 |
| 1.53032065        | 2657.51   |
| 1.532495158333333 | 2659.009  |
| 1.538098808333333 | 2660.511  |
| 1.542845316666667 | 2662.009  |
| 1.544336266666667 | 2663.51   |
| 1.546595416666666 | 2665.0095 |
| 1.552226525       | 2666.5095 |
| 1.557172383333333 | 2668.0102 |
| 1.563389883333334 | 2669.5095 |
| 1.566507558333334 | 2671.0093 |
| 1.568816741666667 | 2672.5098 |
| 1.5719604         | 2674.0105 |
| 1.5819454         | 2675.51   |
| 1.592235233333333 | 2677.01   |
| 1.597538125       | 2678.5105 |
| 1.597505483333333 | 2680.0095 |
| 1.598593          | 2681.509  |
| 1.610163691666667 | 2683.009  |
| 1.609548775       | 2684.5095 |
| 1.6160121         | 2686.0105 |
| 1.615427775       | 2687.51   |
| 1.620023508333333 | 2689.01   |
| 1.614634991666667 | 2690.01   |

**Table S4.** Waves for background-subtracted and normalized WS<sub>4</sub><sup>2-</sup> solution-phase XAS spectra.

| WS4_soln_Int           | WS4_soln_eV |
|------------------------|-------------|
| -0.0006104078588084491 | 2465.1499   |
| 0.0008656534040060995  | 2465.231    |
| 0.002881069561764113   | 2465.3108   |
| 0.0007247784842353325  | 2465.3909   |
| 0.001297259078029847   | 2465.4709   |
| -0.004284295737236634  | 2465.5508   |
| 0.001563484387308609   | 2465.6309   |
| 0.003565328279087724   | 2465.7119   |
| 0.001526076767267263   | 2465.792    |
| 0.0005463232642492113  | 2465.8718   |
| -0.003828485761854265  | 2465.9519   |
| -0.0015960179038478    | 2466.031    |
| 0.001291226990352054   | 2466.1108   |
| -0.008520138124058812  | 2466.1909   |
| 0.007501123362676025   | 2466.271    |
| -0.004295470856700172  | 2466.3508   |
| -0.003489819586079726  | 2466.4319   |
| 0.0001212702460699618  | 2466.512    |
| 0.001012569334381513   | 2466.5918   |
| 0.00236875230103089    | 2466.6719   |
| 0.005624204849393256   | 2466.7529   |
| -0.001793190592496599  | 2466.833    |
| -0.01025745669436256   | 2466.9128   |
| 0.0007785430199037416  | 2466.9939   |
| -0.001121430329152563  | 2467.072    |
| -0.001028342577140234  | 2467.1528   |
| 0.004780387501083698   | 2467.2329   |
| 0.004377005191034926   | 2467.313    |
| 0.00316462248710515    | 2467.3938   |
| 0.009589677498854782   | 2467.4739   |
| 0.01105621420903635    | 2467.5549   |
| 0.0128698082788569     | 2467.6328   |
| 0.02268290036588444    | 2467.7139   |
| 0.0173190190721791     | 2467.7939   |
| 0.01768268187104947    | 2467.874    |
| 0.01823144637832746    | 2467.9548   |
| 0.02097187002066667    | 2468.0339   |
| 0.03544065517081341    | 2468.114    |
| 0.03306550636339556    | 2468.1948   |
| 0.03753883012316446    | 2468.2749   |
| 0.04236951991503011    | 2468.356    |
| 0.05022716043108397    | 2468.4338   |

|                     |           |
|---------------------|-----------|
| 0.05791927933546362 | 2468.5149 |
| 0.06382456951380845 | 2468.5959 |
| 0.07083093357759428 | 2468.6758 |
| 0.08485243669303942 | 2468.7559 |
| 0.1092526003687782  | 2468.8359 |
| 0.1277245438069573  | 2468.916  |
| 0.1334752287723682  | 2468.9958 |
| 0.1809726631099029  | 2469.0759 |
| 0.200908095013416   | 2469.156  |
| 0.256239089867706   | 2469.2368 |
| 0.3148730483830687  | 2469.3169 |
| 0.3789408952762238  | 2469.396  |
| 0.4961579795289893  | 2469.4768 |
| 0.6195612173694524  | 2469.5569 |
| 0.77468760887808    | 2469.637  |
| 0.9971672303746324  | 2469.7168 |
| 1.241120252970433   | 2469.7979 |
| 1.494741819162979   | 2469.877  |
| 1.724432874438099   | 2469.958  |
| 1.948481574475024   | 2470.0378 |
| 2.031544400633581   | 2470.1169 |
| 2.061014774748091   | 2470.198  |
| 1.957264768029482   | 2470.2788 |
| 1.821835456731999   | 2470.3579 |
| 1.580321773986902   | 2470.439  |
| 1.436319032796147   | 2470.5188 |
| 1.293905576411087   | 2470.5979 |
| 1.250418442474477   | 2470.679  |
| 1.233679940146069   | 2470.7578 |
| 1.292595585417742   | 2470.8389 |
| 1.419231302436648   | 2470.9199 |
| 1.541049607798485   | 2470.999  |
| 1.703078311975546   | 2471.0798 |
| 1.75125144691962    | 2471.1589 |
| 1.799120766293153   | 2471.24   |
| 1.767828775960978   | 2471.3188 |
| 1.670687627328338   | 2471.3999 |
| 1.520597041230305   | 2471.479  |
| 1.345095467729486   | 2471.5598 |
| 1.198411063722576   | 2471.6409 |
| 0.9894336358280464  | 2471.72   |
| 0.8295306443898015  | 2471.8008 |
| 0.7335287636255505  | 2471.8809 |
| 0.6178407723512663  | 2471.9619 |
| 0.5673875286665975  | 2472.041  |
| 0.5378338188925829  | 2472.1218 |

|                    |           |
|--------------------|-----------|
| 0.497591129566849  | 2472.2009 |
| 0.5121264053030686 | 2472.282  |
| 0.5107724152397616 | 2472.3608 |
| 0.5233312606102458 | 2472.4419 |
| 0.532246609331833  | 2472.522  |
| 0.5383267532237678 | 2472.6008 |
| 0.5750046746049949 | 2472.6819 |
| 0.5935213780917381 | 2472.762  |
| 0.6084818501896915 | 2472.843  |
| 0.6046072123606883 | 2472.9219 |
| 0.6446390762061776 | 2473.0029 |
| 0.6530523339482206 | 2473.083  |
| 0.6697913358240482 | 2473.1638 |
| 0.6811825470262722 | 2473.2429 |
| 0.7027282791749679 | 2473.323  |
| 0.6924167167210838 | 2473.4038 |
| 0.7320586542271079 | 2473.4829 |
| 0.759612646618096  | 2473.564  |
| 0.7574022055545034 | 2473.6438 |
| 0.7890273913189906 | 2473.7229 |
| 0.802865019360821  | 2473.8049 |
| 0.8029188719206547 | 2473.8838 |
| 0.8168367849157032 | 2473.9629 |
| 0.8107267346347583 | 2474.0449 |
| 0.8194842533747214 | 2474.124  |
| 0.8221628396994531 | 2474.2039 |
| 0.8655247420591714 | 2474.2849 |
| 0.8787927991002281 | 2474.365  |
| 0.875614188361569  | 2474.4438 |
| 0.8692214728932126 | 2474.5249 |
| 0.8770893539170479 | 2474.605  |
| 0.8760273265500537 | 2474.6848 |
| 0.9076772172190239 | 2474.7659 |
| 0.8996002061713357 | 2474.8459 |
| 0.8858062639041491 | 2474.9248 |
| 0.882647604268696  | 2475.0049 |
| 0.8890205308042154 | 2475.0859 |
| 0.8989158090870355 | 2475.166  |
| 0.9103727810341985 | 2475.2458 |
| 0.8969597851426162 | 2475.3269 |
| 0.9264694739953168 | 2475.407  |
| 0.9505442041700216 | 2475.4858 |
| 0.9435652537492928 | 2475.5659 |
| 0.9936959677423101 | 2475.646  |
| 0.9863197268131345 | 2475.7268 |
| 1.045075890876095  | 2475.8069 |

|                   |           |
|-------------------|-----------|
| 1.048600956199896 | 2475.887  |
| 1.071108721204209 | 2475.9668 |
| 1.084753985540003 | 2476.0479 |
| 1.08623883249525  | 2476.1279 |
| 1.132998964451788 | 2476.208  |
| 1.12635726383726  | 2476.2878 |
| 1.134485478503237 | 2476.3679 |
| 1.146151353639832 | 2476.447  |
| 1.178357404755777 | 2476.5288 |
| 1.201414157120977 | 2476.6089 |
| 1.185160927586413 | 2476.689  |
| 1.242052439770004 | 2476.7678 |
| 1.236118789811467 | 2476.8479 |
| 1.25324762218766  | 2476.928  |
| 1.283790494091758 | 2477.0078 |
| 1.302875736562352 | 2477.0898 |
| 1.301660762869768 | 2477.1699 |
| 1.341868294989558 | 2477.25   |
| 1.330387879797027 | 2477.3298 |
| 1.349559073677677 | 2477.4099 |
| 1.354930726894333 | 2477.49   |
| 1.374238968933028 | 2477.5688 |
| 1.384232382389628 | 2477.6499 |
| 1.393466432682291 | 2477.73   |
| 1.398502912596029 | 2477.8088 |
| 1.359062218947079 | 2477.8909 |
| 1.390933374325573 | 2477.9709 |
| 1.327812050246504 | 2478.0508 |
| 1.352901418927734 | 2478.1309 |
| 1.321344224064467 | 2478.2109 |
| 1.282666740950898 | 2478.291  |
| 1.331195603911036 | 2478.3708 |
| 1.276329849367919 | 2478.4519 |
| 1.270032339726069 | 2478.532  |
| 1.248575122009253 | 2478.6118 |
| 1.23398594605882  | 2478.6919 |
| 1.21083854856987  | 2478.772  |
| 1.203920090500908 | 2478.8518 |
| 1.200325580629718 | 2478.9319 |
| 1.172436326473491 | 2479.0129 |
| 1.146612216159405 | 2479.093  |
| 1.136600001837326 | 2479.1729 |
| 1.124840547980012 | 2479.2529 |
| 1.153305511351381 | 2479.333  |
| 1.144452419602348 | 2479.4128 |
| 1.14179761048205  | 2479.4939 |

|                   |           |
|-------------------|-----------|
| 1.117215861420831 | 2479.572  |
| 1.107422906467093 | 2479.6519 |
| 1.101854718939958 | 2479.7329 |
| 1.101526100359248 | 2479.813  |
| 1.084067682870401 | 2479.8928 |
| 1.082288225403292 | 2479.9729 |
| 1.081837892904074 | 2480.054  |
| 1.063401624630946 | 2480.1338 |
| 1.093702310231201 | 2480.2139 |
| 1.059143056940895 | 2480.2949 |
| 1.102402100948607 | 2480.375  |
| 1.035360316362826 | 2480.4539 |
| 1.052803948775415 | 2480.5339 |
| 1.058584993471926 | 2480.615  |
| 1.048817770612485 | 2480.6948 |
| 1.038945855590494 | 2480.7749 |
| 1.01777397950197  | 2480.856  |
| 1.030738039787664 | 2480.9338 |
| 1.064945445326356 | 2481.0149 |
| 1.030334639668557 | 2481.095  |
| 1.022882604467416 | 2481.1758 |
| 1.030997963151065 | 2481.2559 |
| 1.021167162382463 | 2481.3369 |
| 1.04897490788661  | 2481.417  |
| 1.033026090169933 | 2481.4958 |
| 1.057376166151814 | 2481.5759 |
| 1.043610559561436 | 2481.657  |
| 1.038455612022464 | 2481.7368 |
| 1.043567280324526 | 2481.8159 |
| 1.045440150622622 | 2481.897  |
| 1.066312788003036 | 2481.9768 |
| 1.074280175308858 | 2482.0579 |
| 1.077074228448107 | 2482.137  |
| 1.107697332296969 | 2482.2168 |
| 1.107834659723884 | 2482.2979 |
| 1.102492670457884 | 2482.3779 |
| 1.136829535708358 | 2482.4568 |
| 1.121578272418317 | 2482.5378 |
| 1.141043178317245 | 2482.6179 |
| 1.141941279138758 | 2482.699  |
| 1.145098013929989 | 2482.7778 |
| 1.124851910893249 | 2482.8579 |
| 1.132907786279262 | 2482.939  |
| 1.124905498923592 | 2483.0178 |
| 1.122670735436902 | 2483.0989 |
| 1.103515543760951 | 2483.1799 |

|                    |           |
|--------------------|-----------|
| 1.079638333944767  | 2483.2578 |
| 1.10501444626527   | 2483.3389 |
| 1.076311225613259  | 2483.4199 |
| 1.073689504536558  | 2483.499  |
| 1.053222423712306  | 2483.5798 |
| 1.042978358278521  | 2483.6589 |
| 1.017863169879843  | 2483.739  |
| 1.021053337490153  | 2483.8198 |
| 1.022947869930127  | 2483.8989 |
| 1.011496811937964  | 2483.98   |
| 0.9982285062365305 | 2484.0608 |
| 0.9983519059643382 | 2484.1399 |
| 0.978637493800225  | 2484.2209 |
| 0.9914640891511046 | 2484.2998 |
| 0.9788682295215909 | 2484.3809 |
| 0.9954336353766776 | 2484.4619 |
| 0.974576057202084  | 2484.541  |
| 0.9796183067743468 | 2484.6208 |
| 0.9657519997109824 | 2484.7009 |
| 1.004651411249523  | 2484.782  |
| 0.9759662219670461 | 2484.8608 |
| 0.9744882807244222 | 2484.9419 |
| 0.9616166420715685 | 2485.0229 |
| 0.9881208674008172 | 2485.1018 |
| 0.9583366183711699 | 2485.1829 |
| 0.9722477200544675 | 2485.262  |
| 0.9690729567052039 | 2485.343  |
| 0.9945538635328627 | 2485.4219 |
| 0.9892693037442899 | 2485.5029 |
| 0.9511390753887867 | 2485.5818 |
| 0.9452743156821746 | 2485.6628 |
| 0.9377519641184969 | 2485.7429 |
| 0.9724626843139628 | 2485.824  |
| 0.9781337072086541 | 2485.9028 |
| 0.9977781398241052 | 2485.9829 |
| 0.9580300032248855 | 2486.064  |
| 0.9947871599661493 | 2486.1428 |
| 0.9706521273820251 | 2486.2239 |
| 0.9704428048515943 | 2486.303  |
| 0.957349588193885  | 2486.3838 |
| 0.9335450907825052 | 2486.4639 |
| 0.9455575475475178 | 2486.5449 |
| 0.9466206724055788 | 2486.624  |
| 0.9638809060531616 | 2486.7039 |
| 0.9514995049282559 | 2486.7849 |
| 0.9573647077633065 | 2486.864  |

|                    |           |
|--------------------|-----------|
| 1.004193180507102  | 2486.9448 |
| 0.9625754959030676 | 2487.0249 |
| 0.9924823882222101 | 2487.104  |
| 0.9851006628602    | 2487.1848 |
| 0.9625933075281372 | 2487.2649 |
| 0.9904685426897971 | 2487.3459 |
| 0.9549462262232328 | 2487.4258 |
| 0.954753710825662  | 2487.5049 |
| 0.9467953131162578 | 2487.5859 |
| 0.9417578814028322 | 2487.666  |
| 1.005151124345067  | 2487.7449 |
| 0.9634193290118791 | 2487.8269 |
| 0.9924088025095487 | 2487.906  |
| 0.9664606009477491 | 2487.9858 |
| 0.9886043035556082 | 2488.0669 |
| 0.9732391688186004 | 2488.147  |
| 0.9807811794349792 | 2488.2258 |
| 0.962504248629839  | 2488.3079 |
| 0.9525519196390535 | 2488.387  |
| 0.9483849219071711 | 2488.4668 |
| 0.9722267199147512 | 2488.5479 |
| 0.973657533412163  | 2488.6279 |
| 0.9473454854935661 | 2488.708  |
| 0.9636465722426769 | 2488.7869 |
| 0.9797823692997328 | 2488.8689 |
| 0.9705394340035367 | 2488.948  |
| 0.9511087437028654 | 2489.0278 |
| 0.9781148479419863 | 2489.1079 |
| 0.9742242870066067 | 2489.189  |
| 0.950846544755457  | 2489.2688 |
| 0.9426365750544262 | 2489.3489 |
| 0.9752411352492133 | 2489.429  |
| 0.9691562616339877 | 2489.5078 |
| 0.9529071020518486 | 2489.5898 |
| 0.9645163982813161 | 2489.6699 |
| 0.9496483220202708 | 2489.749  |
| 0.9797965157775848 | 2489.8289 |
| 0.9577701152076603 | 2489.9089 |
| 0.9301218021318295 | 2489.99   |
| 0.9264459117707229 | 2490.0698 |
| 0.9650798392187545 | 2490.1499 |
